# Supplementary material for: Obstetric Outcomes of Mothers Previously Exposed to Sexual Violence
Source: PLoS One. 2016 Mar 23;11(3):e0150726. doi: 10.1371/journal.pone.0150726 (PMC4805168; doi:10.1371/journal.pone.0150726)
Supplement: S3 Table — Comparison of delivery interventions among women exposed versus non-exposed to sexual violence: By time from assault to delivery. (DOCX) [file pone.0150726.s003.docx]

**S3. Supplementary Table C.**

|  | **Non-exposed women** | |  | **Women exposed**  **<20 years of agea** | | | |  | **Women exposed**  **≥ 20 years of agea** | | | | | | | | |
| --- | --- | --- | --- | --- | --- | --- | --- | --- | --- | --- | --- | --- | --- | --- | --- | --- | --- |
|  |  |  |  |  |  | **Model** | |  |  | |  | | **Model** | | | | |
|  | **n** | **%** |  | **n** | **%** | **RRb** | **95% CI** |  | **n** | | **%** | | **RRb** | | **95% CI** | | |
| **Total** | **9126** | **89.5** |  | **646** | **6.3** |  |  |  | **422** | **4.1** | |  | |  | | |
| **Elective cesarean section** | 427 | 4.7 |  | 17 | 2.6 | 0.56 | 0.34-0.93 |  | 26 | 6.2 | | 1.32 | | | | 0.84-2.06 | | |
| *Delivery ≤5 years of the assault* |  |  |  | 2 | 0.7 | 0.29 | 0.07-1.18 |  | 12 | 4.9 | | 0.92 | | | | 0.52-1.61 | | |
| *Delivery >5 years of the assault* |  |  |  | 15 | 4.0 | 0.91 | 0.53-1.56 |  | 14 | 8.0 | | 1.13 | | | | 0.65-1.97 | | |
| **Totalc** | **8699** | **89.5** |  | **629** | **6.5** |  |  |  | **396** | **4.1** | |  | | | |  | | |
| **Emergency cesarean section** | 842 | 9.7 |  | 70 | 11.1 | 1.15 | 0.89-1.49 |  | 47 | 11.9 | | 1.23 | | | | 0.91-1.65 | | |
| *Delivery ≤5 years of the assault* |  |  |  | 32 | 11.7 | 1.21 | 0.84-1.75 |  | 26 | 11.1 | | 1.09 | | | | 0.75-1.58 | | |
| *Delivery >5 years of the assault* |  |  |  | 38 | 10.7 | 1.23 | 0.88-1.70 |  | 21 | 13.0 | | 1.24 | | | | 0.80-1.92 | | |

**Comparison of delivery interventions among women exposed versus non-exposed to sexual violence: By time from assault to delivery**

| **Instrumental vaginal delivery** | 698 | 8.0 | 65 | 10.3 | 1.29 | 1.00-1.66 | 28 | 7.1 | 0.88 | 0.61-1.28 |
| --- | --- | --- | --- | --- | --- | --- | --- | --- | --- | --- |
| *Delivery ≤5 years of the assault* |  |  | 33 | 12.1 | 1.28 | 0.92-1.78 | 14 | 6.0 | 0.74 | 0.43-1.27 |
| *Delivery >5 years of the assault* |  |  | 32 | 9.0 | 1.30 | 0.92-1.83 | 14 | 8.7 | 1.14 | 0.70-1.87 |
| **Emergency instrumental deliveryd** | 1540 | 17.7 | 135 | 21.5 | 1.21 | 1.02-1.44 | 75 | 18.9 | 1.07 | 0.85-1.36 |
| *Delivery ≤5 years of the assault* |  |  | 65 | 23.8 | 1.24 | 0.99-1.56 | 40 | 17.0 | 0.94 | 0.70-1.25 |
| *Delivery >5 years of the assault* |  |  | 70 | 19.7 | 1.26 | 1.00-1.59 | 35 | 21.7 | 1.20 | 0.87-1.65 |

aThose who attended more than once were categorized according to age at first attendance and date of the latest assault leading to attendance to the Rape Trauma Service.

bRelative Risks with non-exposed women as a reference group. Data matched on age, parity and season and year of delivery. Time stratified analyses were adjusted for age, parity and year of delivery.

cWomen who underwent elective cesarean section were excluded from all other analyses in this table.

dEither emergency cesarean section or instrumental vaginal delivery.
