# Supplementary material for: Obstetric Outcomes of Mothers Previously Exposed to Sexual Violence
Source: PLoS One. 2016 Mar 23;11(3):e0150726. doi: 10.1371/journal.pone.0150726 (PMC4805168; doi:10.1371/journal.pone.0150726)
Supplement: S4 Table — Labor characteristics and delivery interventions among women exposed versus non-exposed to sexual violence: Restricted to each exposed woman‘s first subsequent delivery following the exposure. (DOCX) [file pone.0150726.s004.docx]

| **S4. Supplementary table D**  **Labor characteristics and delivery interventions among women exposed versus non-exposed to sexual violence:**  **Restricted to each exposed woman‘s first subsequent delivery following the exposure** | | | | | | | | |
| --- | --- | --- | --- | --- | --- | --- | --- | --- |
| **Non-exposed women** | | | | **Exposed women,**  **first subsequent delivery** | | | | |
|  | **n** | **%** | **n** | | **%** | **RRa** | **95% CI** |
| **Totalb** | **8699** |  | **641** | |  |  |  |
| **Induced labor** | 2273 | 26.1 | 196 | | 30.6 | 1.09 | 0.97-1.22 |
| **Labor dystocia** | 729 | 8.4 | 80 | | 12.5 | 1.10 | 0.88-1.36 |
| Prolonged first stage  of labor | 292 | 3.4 | 38 | | 5.9 | 1.39 | 1.00-1.93 |
| Prolonged second stage  of labor | 356 | 4.1 | 37 | | 5.8 | 0.98 | 0.71-1.35 |
| **Maternal distress during**  **labor and delivery** | 96 | 1.1 | 13 | | 2.0 | 1.37 | 0.77-2.44 |
| **Antepartum bleeding** | 96 | 1.1 | 16 | | 2.5 | 2.16 | 1.27-3.65 |
| Placental abruption | 36 | 0.4 | 6 | | 0.9 | 2.29 | 0.98-5.32 |
| **Emergency cesarean section** | 842 | 9.7 | 82 | | 8.9 | 1.12 | 0.90-1.39 |
| **Instrumental vaginal delivery** | 698 | 8.0 | 79 | | 12.3 | 1.13 | 0.91-1.41 |
| **Emergency instrumental deliveryc** | 1540 | 17.7 | 161 | | 25.1 | 1.12 | 0.98-1.29 |
| **Totalb** | **9126** |  | **667** | |  |  |  |
| **Elective cesarean section** | 427 | 4.7 | 26 | | 3.9 | 1.14 | 0.77-1.69 |

aRelative Risks with non-exposed women as a reference group. Adjusted for age, parity and year of delivery.

bWomen who underwent elective cesarean section were excluded from all other analyses in this table.

cEither emergency cesarean section or vaginal instrumental delivery.
